# Supplementary material for: Self-assembled quantum dot microstructure guided by a microemulsion approach for immunoassays
Source: Royal Society of Chemistry journal article supplement (doi:10.1039/c9ra05719f), 2019-01-01
Supplement: c9ra05719f1.pdf [file c9ra05719f1.pdf]

## Supplementary Information

### Self-assembled Quantum Dots Microstructure Guided by Microemulsion Approach for Immunoassays

Jing Liang,<sup>a</sup> Lei Yu,<sup>b</sup> Xue Li,<sup>a</sup> Jiejing Zhang,<sup>a</sup> Guang Chen,<sup>a</sup> Jianfeng Zhang\*<sup>a</sup>

<sup>a</sup> College of life science, Jilin Agricultural University, Key Laboratory of Straw Biology and Utilization,  
the Ministry of Education, Changchun 130118, China

<sup>b</sup> Jilin Radion and TV University, Changchun 130022, China

E-mail: zhangjianfeng06@tsinghua.org.cn

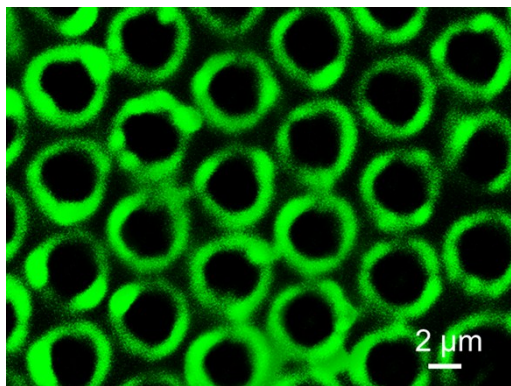

**Fig. S1** CLSM images of PS porous film with green fluorescent QDs.
